# Supplementary material for: Toward a human brain extracellular vesicle atlas: Characteristics of extracellular vesicles from different brain regions, including small RNA and protein profiles
Source: PubMed Central journal article supplement (PMC10712435; doi:10.1002/inmd.20230016), 2023-08-15

Figure S1

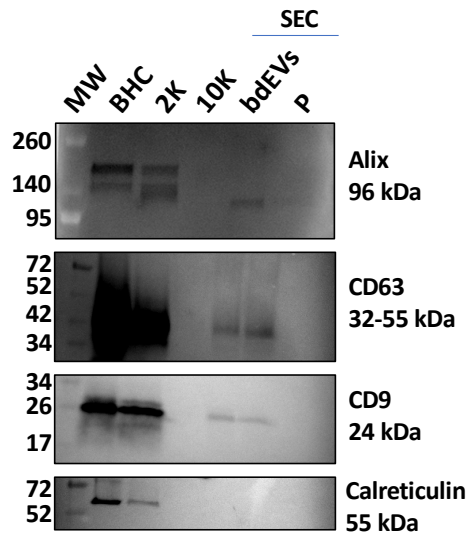

Figure S2

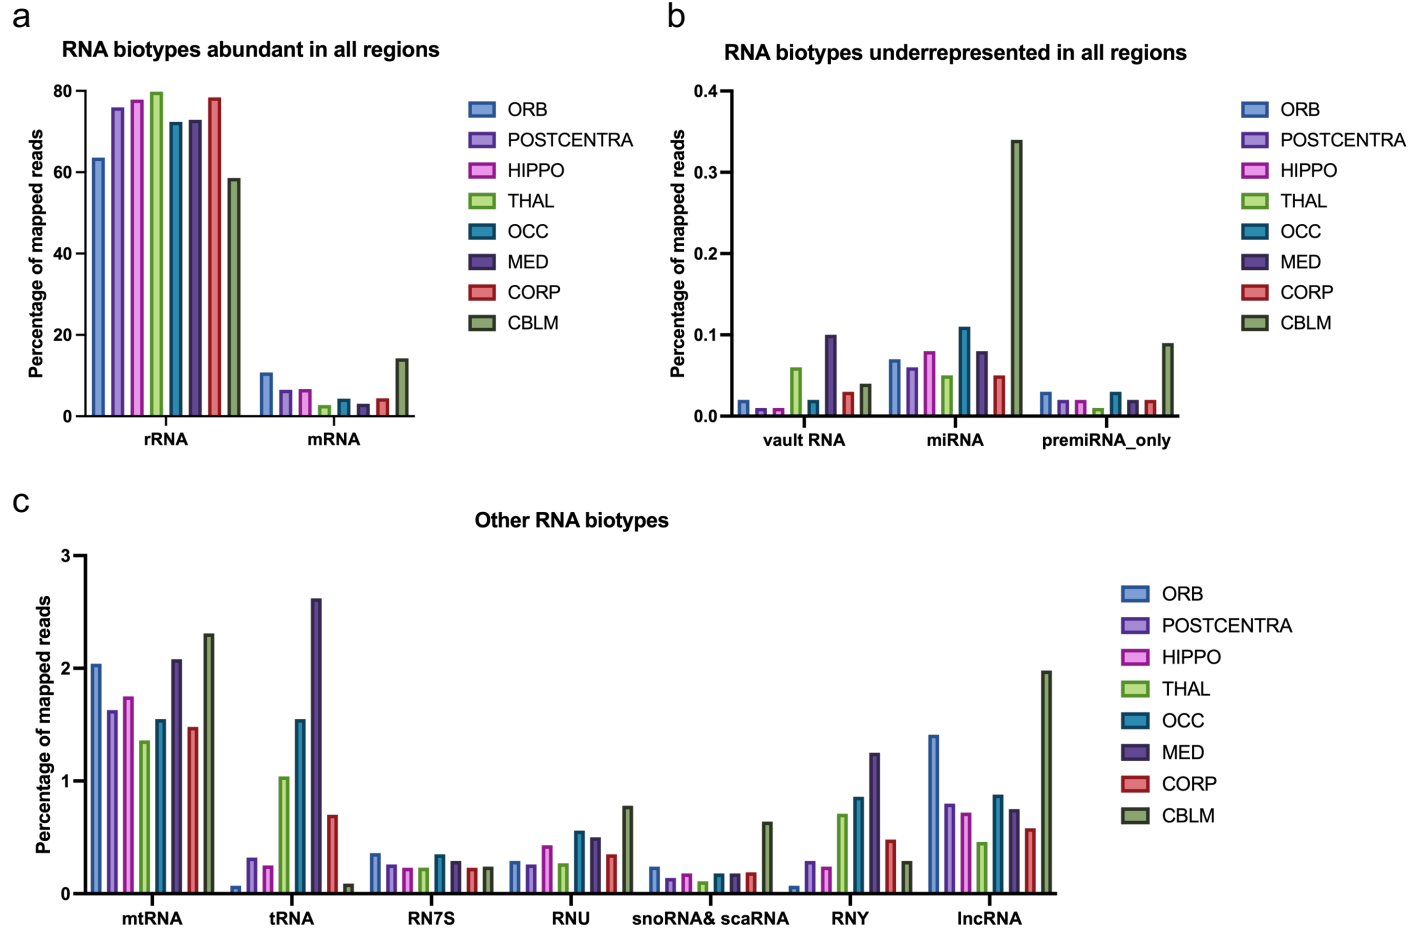

Supplement: INMD-1-e20230016-s002.pdf [file INMD-1-e20230016-s002.pdf]
